# Supplementary material for: Maintenance of CD8+ memory T lymphocytes in the spleen but not in the bone marrow is dependent on proliferation
Source: PubMed Central journal article supplement — Eur J Immunol. 2017 Oct 11;47(11):1900–5. doi: 10.1002/eji.201747063 (PMC5698754; doi:10.1002/eji.201747063), 2017-10-11
Supplement: EJI-47-1900-s002.pdf [file EJI-47-1900-s002.pdf]

# European Journal of Immunology

Supporting Information  
for

**DOI 10.1002/eji.201747063**

Francesco Siracusa, Özen Sercan Alp, Patrick Maschmeyer, Mairi McGrath,  
Mir-Farzin Mashreghi, Shintaro Hojyo, Hyun-Dong Chang, Koji Tokoyoda  
and Andreas Radbruch

**Maintenance of CD8<sup>+</sup> memory T lymphocytes  
in the spleen but not in the bone marrow is dependent on proliferation**

## Supporting information

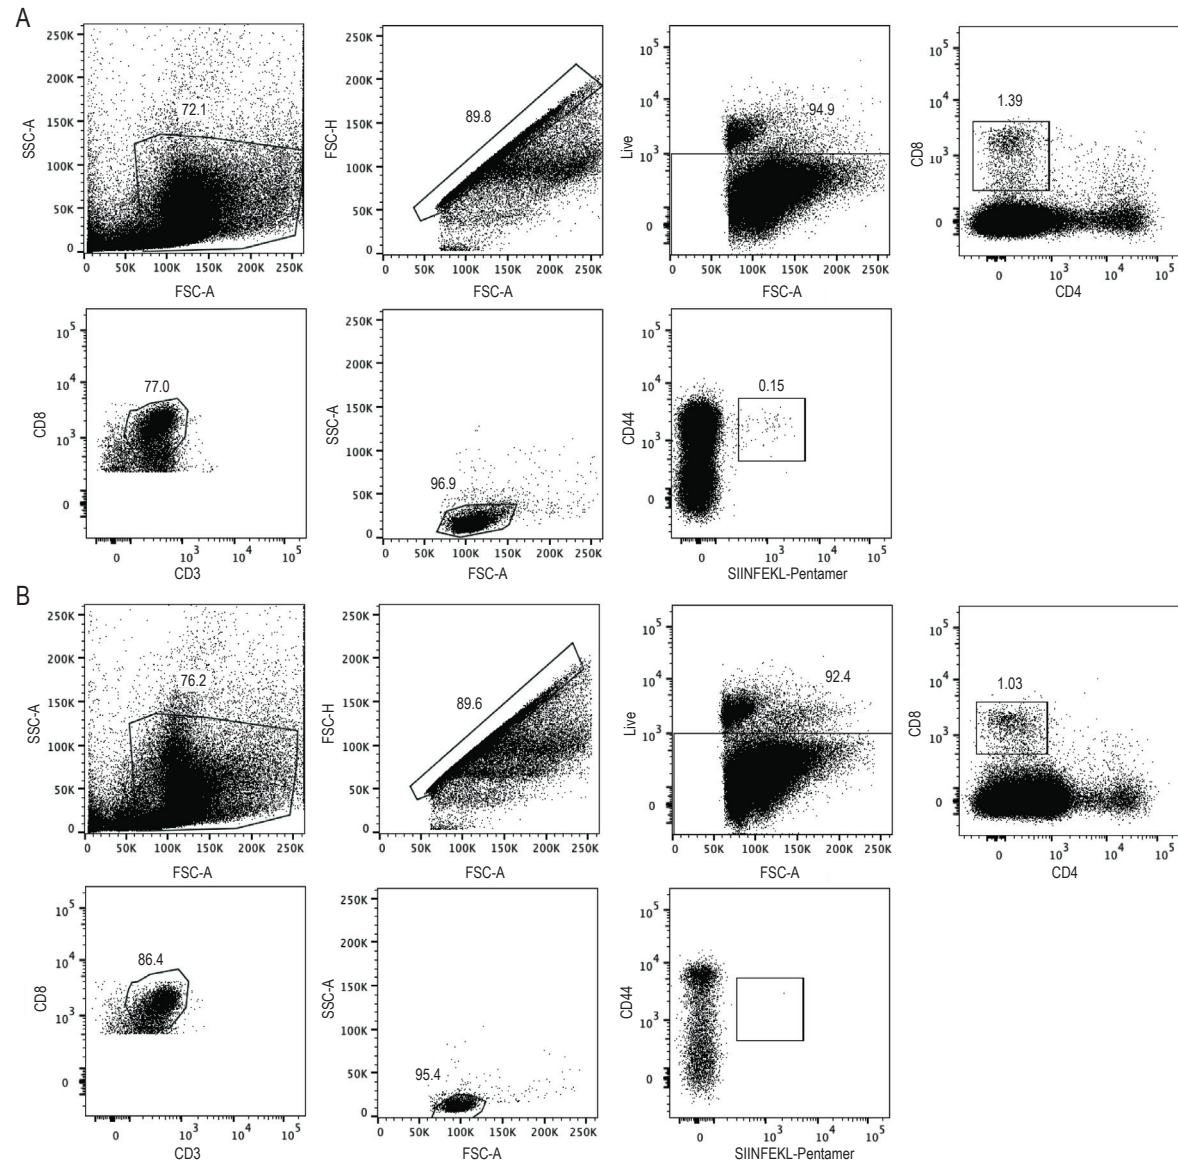

**Fig. 1: Gating strategy for the detection of SIINFEKL-specific CD8<sup>+</sup> memory T cells.** (A) Representative dot plots showing full gating strategy used for the detection of SIINFEKL-specific CD8<sup>+</sup> memory T cells in the bone marrow of ovalbumin-immunized mice. (B) Representative dot plots showing full gating strategy used for the detection of background signal coming from SIINFEKL-pentamer in the bone marrow of naïve mice. Absolute cell numbers of SIINFEKL-specific CD8<sup>+</sup> memory T cells were calculated as  $\text{SIINFEKL-specific CD8}^+ \text{ memory T cells}_{(\text{OVA mice})} - \text{SIINFEKL-specific CD8}^+ \text{ memory T cells}_{(\text{naïve mice})}$ .
